## Decentralized governance may lead to higher infection levels and sub-optimal releases of quarantines amid the COVID-19 pandemic

Adam Lampert<sup>1,\*</sup>

(1) Institute of Environmental Sciences, The Robert H. Smith Faculty of Agriculture, Food and Environment, The Hebrew University of Jerusalem, Rehovot, Israel

\* Corresponding author, Email: [adam.lampert@mail.huji.ac.il](mailto:adam.lampert@mail.huji.ac.il)

Feb. 11, 2022

### Abstract

1 The outbreak of the novel Coronavirus (COVID-19) has led countries worldwide to administer  
2 quarantine policies. However, each country or state decides independently what mobility  
3 restrictions to administer within its borders, while aiming to maximize its own citizens' welfare.  
4 Since individuals travel between countries and states, the policy in one country affects the  
5 infection levels in other countries. Therefore, major question is whether the policies dictated by  
6 multiple governments could be efficient. Here we focus on the decision regarding the timing of  
7 releasing quarantines, which were common during the first year of the pandemic. We consider a  
8 game-theoretical epidemiological model in which each government decides when to switch from  
9 a restrictive to a non-restrictive quarantine and vice versa. We show that, if travel between  
10 countries is frequent, then the policy dictated by multiple governments is sub-optimal. But if  
11 international travel is restricted, then the policy may become optimal.

**Keywords:** COVID-19, dynamic games, international policy, quarantine policy

**Word count:** abstract – 147 words; main text – 1498 words.

### Introduction

12 The outbreak of the novel Coronavirus (COVID-19) necessitated quarantine policies, particularly  
13 during its early stages, before vaccines were available [1-4]. While mobility restriction measures  
14 have been taken during several disease outbreaks in history [5-11], the quarantines needed for  
15 the COVID-19 pandemic were at global scales that encompass entire countries. Such quarantines  
16 have economic and social costs [12, 13], and major relevant questions are how restrictive the  
17 quarantines should be, and what would be the right timing to release some of the mobility  
18 restrictions [1-3]. In practice, this decision is made independently by multiple countries [14-16],  
19 or independently by multiple states in countries like the U.S., or even independently by multiple  
20 municipal authorities [17]. Each governor might incline to dictate the strategy that best serves  
21 her/his own citizens; however, in periods when the quarantines are less restrictive, travelers can

22 transmit the disease between countries, states, and cities. Consequently, the quarantine policy  
23 in one country/state may ultimately affect the outcome in other countries/states.

24 Such decentralized governance has a benefit: Each country or state may have a better knowledge  
25 of its own citizens' lifestyle and needs and may dictate a policy that better suits its own citizens.  
26 However, the decentralized policy also comes with a cost: Each government might ignore the  
27 cost borne to citizens of other countries due to international and interstate travel. Accordingly,  
28 various previous game theory studies have suggested that agents (individuals or countries)  
29 under-invest in the prevention and control of diseases [18-23].

30 In this paper, we examine the case where each governor decides independently about the timing  
31 of releasing the quarantine, and we ask what the inefficiency is due to such decentralized  
32 governance. Namely, we examine how the strategies of different governments differ from the  
33 socially optimal strategy of a hypothetical centralized government that aims to maximize the  
34 welfare of all the citizens in all the countries. Specifically, we consider two countries/states, and  
35 we analyze the following three cases (Fig. 1) [14-16, 24]: (1) the countries have approximately  
36 the same population size and infection level; (2) the countries have approximately the same  
37 population size, but one country experiences a more severe outbreak at a given point in time;  
38 and (Case 3) one state experiences a more severe outbreak compared to the rest of the country.

## Model

39 Our model is general, but some of the assumptions and parameterization are motivated by the  
40 COVID-19 outbreak. We consider two states or countries, 1 and 2, and in line with data about  
41 early COVID-19 outbreaks [4, 14, 16, 24-27], we assume that the number of infected people in  
42 each country is very small compared to the country's total population size. Accordingly, we  
43 consider only the dynamics of the infection level in each country,  $I_i$ , defined as the portion of  
44 individuals that are infected in country  $i$ . (Namely, in contrast to traditional SIR models [28], here  
45 we consider shorter timescales during which the number of susceptible individuals is constant,  
46 which is in line with the COVID-19 data from 2020, when quarantines were common [4, 14, 16,  
47 24-27]).

48 We assume for simplicity that each government can administer one of two types of quarantine  
49 at any given time: restrictive and non-restrictive. Each government can choose when to switch  
50 between these two quarantines. We assume that under a restrictive quarantine in country  $i$ ,  $I_i$   
51 decreases exponentially after the first two weeks at a rate  $-r_0$  as long as  $I_i > I_{\min}$ . (Even a  
52 restrictive quarantine is not expected to eliminate the disease entirely, and  $I_{\min}$  characterizes  
53 some minimal infection level that persists in the population.) In turn, according to evidence  
54 showing that the infection level may still increase under non-restrictive quarantine conditions [4,  
55 14, 16, 26, 27], we assume that  $I_i$  increases at a rate  $r_i$  under a non-restrictive quarantine, where

56  $r_i$  is country-specific and can be higher in those countries or states where interactions among  
57 individuals are more frequent. Also, we assume that if a country is under a restrictive quarantine,  
58 there is no travel from or to that country, whereas if both countries are under a non-restrictive  
59 quarantine, some individuals travel between these countries. We describe in more detail the  
60 dynamics of  $I_1$  and  $I_2$  in Methods: Dynamics of the infection levels.

61 In turn, the government in each country dictates the timing at which it switches from the non-  
62 restrictive quarantine to the restrictive one and vice versa. We assume that a government will  
63 not allow the health system in its country to collapse [29], and therefore, it will always switch to  
64 a restrictive quarantine if  $I_i$  approaches some maximum capacity,  $I_i = I_{\max}$ . In turn, under this  
65 constraint, the objective of each government is to maximize the proportion of time during which  
66 its own citizens are under a non-restrictive quarantine. We describe in more detail the objective  
67 functions in Methods: Objective functions.

68 Finally, we calculate the strategies of the governments in a Nash equilibrium and compare them  
69 to the socially optimal solution. In general, the Nash equilibria in such a dynamic game depend  
70 on various assumptions about the information that each government has [30]. Here we assume  
71 that each government does not get feedback about the infection level in the other country/state  
72 and decides in advance when it releases the quarantine. In our model, this results in a unique  
73 Nash equilibrium per a given set of parameter values (open-loop Nash equilibrium [30]). The  
74 numerical method that we used for finding the open-loop Nash equilibria and the optimal  
75 solutions is described in Methods: Numerical methods.

## Results & Discussion

76 Our results show that, in all three cases, if the number of travelers between the countries is  
77 greater than a certain threshold, the governments switch to a non-restrictive quarantine sooner  
78 compared to the socially optimal solution (Figs. 2,3). Namely, in Nash equilibrium, the governors  
79 administer the restrictive quarantine for shorter periods compared to the socially optimal  
80 solution. In turn, this results in shorter periods before the infection level approaches its full  
81 capacity and the restrictive quarantine is administered again (Figs. 2,3). Consequently, under  
82 decentralized governance, the solution is sub-optimal, the total amount of time during which a  
83 restrictive quarantine is administered is greater, and the average infection level is higher. This  
84 result is consistent with previous results that suggested that agents under-invest in the control  
85 of diseases [18-23]. Note that in both the optimal solution and the Nash equilibrium, the  
86 governments' actions tend to be synchronized as the second country to switch does so when its  
87 infection level is similar to that of the other country (Fig. 2D,F).

88 The difference between the optimal solution and the Nash equilibrium emerges if the number of  
89 travelers between the countries is above a certain threshold, in which case the inefficiency (price

90 of anarchy) increases with the number of travelers (Fig. 3). However, if the number of travelers  
91 is below the threshold, the Nash equilibrium and the optimal solution are identical (Fig. 3). This  
92 suggests that one way to prevent the inefficiency due to the decentralized governance is to  
93 restrict international or interstate travel to a low level even when the quarantines are non-  
94 restrictive.

95 There are two mutually dependent reasons why decentralized governance results in releasing  
96 the restrictive quarantine sooner. First, each governor ignores the damages that its own travelers  
97 inflict on other countries, and thus, keeping a higher level of infection is perceived by the  
98 governor as less costly. Second, as a consequence of the first reason, each country hosts more  
99 infected travelers from the other country, and its own travelers are also hosted in countries with  
100 higher infection levels. Consequently, if the infection level in a given country is low, it increases  
101 rapidly due to travel, and therefore, it is not worthwhile for the country to reduce its infection  
102 level beyond a certain value (where due to travel, this value may be lower than  $I_{\min}$ ).

103 Finally, note that we have made numerous simplifying assumptions in our model, which suggests  
104 various future directions for examining the consequences of relaxing these assumptions. First,  
105 we considered only two types of quarantine, whereas in reality, more options are available. In  
106 particular, governments can try to administer an intermediate level of quarantine that keeps the  
107 infection at a constant level. Examining whether this policy is better than the ones that we  
108 considered is beyond the scope of this paper (see [2, 3, 29]); however, a similar result will likely  
109 hold: Decentralized governance might maintain a higher infection level than the optimum.  
110 Second, we assumed that travel is allowed under non-restrictive quarantine. However, it would  
111 be interesting to examine policies that also dictate how to best integrate the quarantine policy  
112 with travel policy. Specifically, further restrictions on travel might mitigate the problem (Fig. 3);  
113 however, restrictions on travel come with economic costs [13]. Third, we considered only two  
114 countries, whereas considering more countries is generally expected to increase the price of  
115 anarchy [30]. And fourth, we considered open-loop solutions in which the governments pre-  
116 determine their policy, but communication among the governments might lead to the formation  
117 of agreements and coordination of a more global quarantine policy.

## References

1. Ferguson, N.M., et al., *Impact of non-pharmaceutical interventions (NPIs) to reduce COVID-19 mortality and healthcare demand*. DOI: <https://doi.org/10.25561/77482>, 2020.
2. Alvarez, F.E., D. Argente, and F. Lippi, *A simple planning problem for COVID-19 lockdown*. 2020, National Bureau of Economic Research.
3. Piguillem, F. and L. Shi, *The optimal COVID-19 quarantine and testing policies*. 2020, Einaudi Institute for Economics and Finance (EIEF).

4. Fang, Y., Y. Nie, and M. Penny, *Transmission dynamics of the COVID-19 outbreak and effectiveness of government interventions: A data-driven analysis*. Journal of Medical Virology, 2020. **92**(6): p. 645-659.
5. Ferguson, N.M., et al., *Strategies for containing an emerging influenza pandemic in Southeast Asia*. Nature, 2005. **437**(7056): p. 209-214.
6. Glass, R.J., et al., *Targeted social distancing designs for pandemic influenza*. Emerging Infectious Diseases, 2006. **12**(11): p. 1671.
7. Wallis, P. *A dreadful heritage: Interpreting epidemic disease at Eyam, 1666–2000*. in *History Workshop Journal*. 2006. Oxford University Press.
8. Halloran, M.E., et al., *Modeling targeted layered containment of an influenza pandemic in the United States*. Proceedings of the National Academy of Sciences, 2008. **105**(12): p. 4639-4644.
9. Kohn, G.C., *Encyclopedia of plague and pestilence: from ancient times to the present*. 2007: Infobase Publishing.
10. Davis, R., *The Spanish flu: narrative and cultural identity in Spain, 1918*. 2013: Springer.
11. Tognotti, E., *Lessons from the history of quarantine, from plague to influenza A*. Emerging Infectious Diseases, 2013. **19**(2): p. 254.
12. Atkeson, A., *What will be the economic impact of COVID-19 in the US? Rough estimates of disease scenarios*. 2020, National Bureau of Economic Research.
13. Eichenbaum, M.S., S. Rebelo, and M. Trabandt, *The macroeconomics of epidemics*. 2020, National Bureau of Economic Research.
14. Chinazzi, M., et al., *The effect of travel restrictions on the spread of the 2019 novel coronavirus (COVID-19) outbreak*. Science, 2020. **368**(6489): p. 395-400.
15. Sohrabi, C., et al., *World Health Organization declares global emergency: A review of the 2019 novel coronavirus (COVID-19)*. International Journal of Surgery, 2020.
16. Flaxman, S., et al., *Report 13: Estimating the number of infections and the impact of non-pharmaceutical interventions on COVID-19 in 11 European countries*. 2020.
17. Ren, X., *Pandemic and lockdown: a territorial approach to COVID-19 in China, Italy and the United States*. Eurasian Geography and Economics, 2020. **61**(4-5): p. 423-434.
18. Francis, P.J., *Dynamic epidemiology and the market for vaccinations*. Journal of Public Economics, 1997. **63**(3): p. 383-406.
19. Barrett, S., *Global disease eradication*. Journal of the European Economic Association, 2003. **1**(2-3): p. 591-600.
20. Bauch, C.T. and D.J. Earn, *Vaccination and the theory of games*. Proceedings of the National Academy of Sciences, 2004. **101**(36): p. 13391-13394.
21. Gersovitz, M. and J.S. Hammer, *The economical control of infectious diseases*. The Economic Journal, 2004. **114**(492): p. 1-27.
22. Barrett, S., *The smallpox eradication game*. Public Choice, 2007. **130**(1-2): p. 179-207.
23. Fenichel, E.P., *Economic considerations for social distancing and behavioral based policies during an epidemic*. Journal of health economics, 2013. **32**(2): p. 440-451.
24. World-Health-Organization, *Coronavirus disease 2019 (COVID-19): situation report, 72*. 2020.
25. Linton, N.M., et al., *Incubation period and other epidemiological characteristics of 2019 novel coronavirus infections with right truncation: a statistical analysis of publicly available case data*. Journal of Clinical Medicine, 2020. **9**(2): p. 538.
26. European Centre for Disease Prevention and Control. 2020; <https://www.ecdc.europa.eu/en/geographical-distribution-2019-ncov-cases>].
27. COVID-19 Data Repository by the Center for Systems Science and Engineering (CSSE) at Johns Hopkins University. 2020;

<https://www.arcgis.com/apps/opsdashboard/index.html#/bda7594740fd40299423467b48e9ecf6>].

28. Anderson, R.M. and R.M. May, *Population biology of infectious diseases: Part I*. Nature, 1979. **280**(5721): p. 361-367.
29. Ferguson, N., et al., *Report 9: Impact of non-pharmaceutical interventions (NPIs) to reduce COVID19 mortality and healthcare demand*. 2020.
30. Dockner, E.J., et al., *Differential games in economics and management science*. 2000: Cambridge University Press.
31. Bichara, D., et al., *SIS and SIR epidemic models under virtual dispersal*. Bulletin of Mathematical Biology, 2015. **77**(11): p. 2004-2034.
32. Castillo-Chavez, C., D. Bichara, and B.R. Morin, *Perspectives on the role of mobility, behavior, and time scales in the spread of diseases*. Proceedings of the National Academy of Sciences, 2016. **113**(51): p. 14582-14588.
33. Clark, C., *Mathematical bioeconomics: The Mathematics of Conservation*. Third ed. 2010: Joan Wiley & Sons.

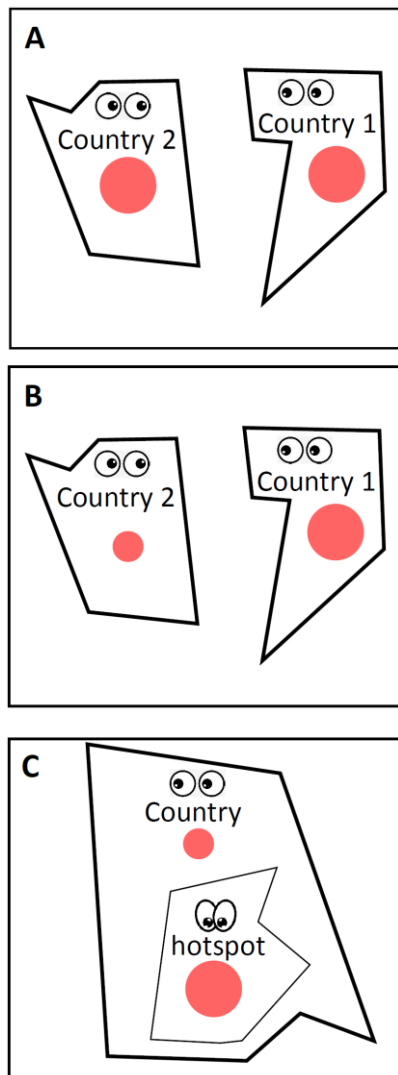

118 **Figure 1: Illustration of the three cases that we consider.** (A) Case 1: Both countries have the  
119 same population size and infection level. (B) Case 2: Both countries have the same population  
120 size, but country 1 has a more severe outbreak. (C) Case 3: One U.S. state is a “hotspot” and has  
121 a more severe outbreak than the rest of the U.S.

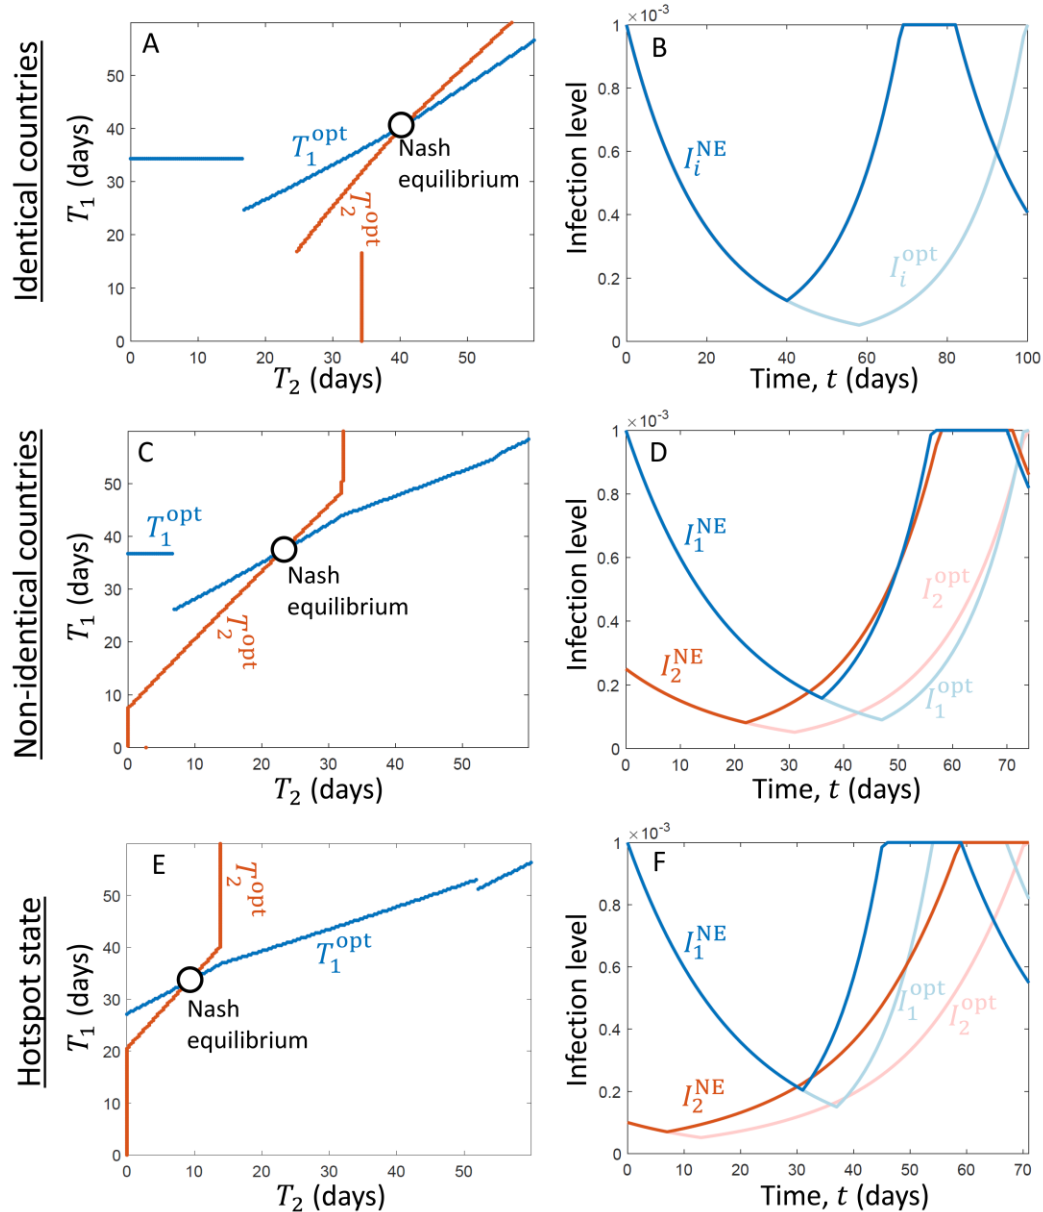

122 **Figure 2: The equilibrium solution dictates that governments release the quarantines earlier**  
 123 **than optimal.** We consider the three cases illustrated in Fig. 1: identical countries (A, B), non-  
 124 identical countries (C, D), and a state that initially has a much higher infection level than the rest  
 125 of the U.S. (E, F). The left column (A, C, E) shows the optimal time for country 1 to release the  
 126 quarantine,  $T_1^{\text{opt}}$ , as a function of the day when country 2 releases the quarantine,  $T_2$  (blue line).  
 127 It also shows the optimal time for country 2 to release the quarantine,  $T_2^{\text{opt}}$ , as a function of the  
 128 day when country 1 releases the quarantine,  $T_1$ , on a flipped axis (mirror image, red line). The  
 129 intersection of the blue and the red line indicates the open-loop Nash equilibrium. In turn, the  
 130 right column (B, D, E) shows the time evolution of the infection level in countries 1 and 2,  
 131 assuming that they adopt the Nash equilibrium strategies ( $I_1^{\text{NE}}$ , blue line, and  $I_2^{\text{NE}}$ , red line), as



132 well as the infection levels assuming that the countries adopt the socially optimal solution ( $I_1^{\text{opt}}$ ,  
133 light blue line, and  $I_2^{\text{opt}}$ , light red line). In all three cases, the governments release the quarantine  
134 sooner than the optimum if they follow the Nash equilibrium. Moreover, in both the optimal  
135 solution and the Nash equilibrium, the second country to release the quarantine does so  
136 approximately when its infection level approaches that of the other country.

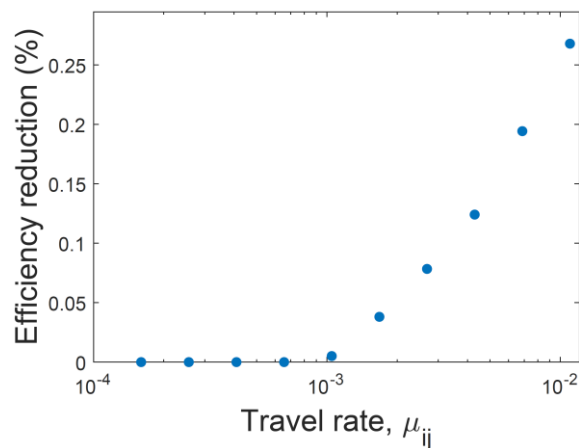

137 **Figure 3: Travel between states may lead to inefficient quarantine policy within each state.**  
138 Demonstrated is the increase in the relative time that a restrictive quarantine is administered  
139 (efficiency reduction, a.k.a. “cost of anarchy”) in a Nash equilibrium (decentralized government)  
140 compared to the optimal solution. The efficiency reduction is zero if the proportion of travelers  
141 in the population (travel rate,  $\mu_{ij}$ ) is below a certain threshold, and increases with  $\mu_{ij}$  above that  
142 threshold.

## Supplementary Online Materials

### Methods

#### Dynamics of the infection levels

143 Here we describe in detail the dynamics of  $I_1(t)$  and  $I_2(t)$ , which characterize the proportions of  
144 infected individuals in the populations of countries 1 and 2, respectively. Assume that each of the  
145 two countries can be under a restrictive quarantine or a non-restrictive quarantine, and the type  
146 of quarantine can change over time. The dynamics of  $I_i$  at time  $t$  depend on the type of  
147 quarantine administered in both countries at that time.

#### 148 Option 1: Country $i$ is under a restrictive quarantine.

149 If country  $i$  is under a restrictive quarantine at time  $t$ ,  $I_i(t)$  declines at a daily rate  $-r_0$ , regardless  
150 of what happens in the other country (no travel). However, there are two exceptions. First,  $I_i$   
151 cannot decline below a certain threshold,  $I_{\min}$ , characterizing the minimal level of infection in  
152 the population. Second, if the government switches from restrictive to non-restrictive  
153 quarantine,  $I_i$  starts to decline only after a delay of  $T_{\text{delay}}$  days. Therefore, in summary,

$$\frac{dI_i}{dt} = \begin{cases} r_0 I_i & \text{if } I_i > I_{\min} \text{ and } t_s > T_{\text{delay}} \\ 0 & \text{otherwise,} \end{cases} \quad (1)$$

154 where  $t_s$  is the time (in days) from the day when the quarantine became restrictive.

#### 155 Option 2: Country $i$ is under a non-restrictive quarantine, but the other country, $j \neq i$ , is under a 156 restrictive quarantine.

157 In this case, there is still no travel between the countries due to the restrictive quarantine in  
158 country  $j$ . Consequently,  $I_i$  grows exponentially at a daily rate  $r_i$ :

$$\frac{dI_i}{dt} = r_i I_i . \quad (2)$$

#### 159 Option 3: Both countries are under a non-restrictive quarantine

160 In this case, individuals travel between the countries, where  $\mu_{ij}$  of the residents of country  $i$  are  
161 in travel to country  $j$ . If we assume that the number of travelers from a country is much smaller  
162 than the number of the country's own residents ( $\mu_{ij} \ll N_i$  and  $\mu_{ji} \ll N_j$ ), it follows that

$$\frac{dI_i}{dt} = r_i I_i + \frac{r_i \mu_{ji} + r_j \mu_{ij}}{N_i} I_j . \quad (3)$$

163 Specifically, (i) the term  $r_i I_i$  characterizes residents of country  $i$  that get infected inside country  
 164  $i$  by other residents of country  $i$ ; (ii) the term  $r_i \mu_{ji}/N_i$  characterizes residents of country  $i$  that  
 165 get infected inside country  $i$  by residents of country  $j$ ; and (iii) the term  $r_j \mu_{ij}/N_i$  characterizes  
 166 residents of country  $i$  that get infected inside country  $j$  by residents of country  $j$ . Note that we  
 167 assume that travel is temporary (Lagrangian approach [31, 32]); that is, a traveler from country  
 168 1 to country 2 is still a resident of country 1 who will return to country 1, and therefore, is s/he  
 169 gets infected, it increases  $I_1$ , even the infection has occurred in country 2.

170 In turn, without the simplifying assumption that  $\mu_{ij} \ll N_i$ , Eq. (3) can be written in a more general  
 171 form:

$$\frac{dI_i}{dt} = \left[ \frac{r_i (N_i - \mu_{ij})^2}{N_i - \mu_{ij} + \mu_{ji}} + \frac{r_j \mu_{ij}^2}{N_j - \mu_{ji} + \mu_{ij}} \right] \frac{1}{N_i} I_i + \left[ \frac{r_i (N_i - \mu_{ij}) \mu_j}{N_i - \mu_{ij} + \mu_{ji}} + \frac{r_j \mu_{ij} (N_j - \mu_{ji})}{N_j - \mu_{ji} + \mu_{ij}} \right] \frac{1}{N_i} I_j . \quad (4)$$

172 In our simulations, we used values of  $\mu_{ij}$  that are much smaller than  $N_i$  (see Parameterization  
 173 subsection), and therefore, the results obtained using Eq. (3) and those obtained using Eq. (4)  
 174 were almost indistinguishable.

### Objective functions

175 The government in each country chooses the time periods during which each type of quarantine  
 176 is administered in that country. We assume that the objective of each government is to maximize  
 177 the relative time during which the quarantine is non-restrictive in its country, under the  
 178 constraint that the health system does not collapse, and therefore, a restrictive quarantine has  
 179 to be administered in country  $i$  whenever  $I_i$  approaches  $I_{\max}$  [29].

180 Specifically, denote  $T_i^{\text{tot}}$  as the time to complete a cycle during which  $I_i$  increases to  $I_{\max}$  and  
 181 returns back to its initial value,  $I_i(0)$ . In turn, denote  $T_i^{\text{non}}$  as the total time within such a cycle  
 182 during which a non-restrictive quarantine is administered in country  $i$ . Then, we define the utility  
 183 of country  $i$  as

$$u_i = \frac{T_i^{\text{non}}}{T_i^{\text{tot}}} . \quad (5)$$

184 In turn, we calculate both the optimal solution and the open-loop Nash equilibrium. Specifically,  
 185 the optimal strategy is the one that maximizes  $N_1 u_1 + N_2 u_2$ . The open-loop Nash equilibrium is  
 186 given by the set of pre-determined strategies that are such that no country can increase its own  
 187 utility by unilaterally changing its strategy.

### Numerical methods

188 Since the growth rates of  $I_1$  and  $I_2$  are piecewise-linear, and since we considered a time delay  
189 after the government switches to restrictive quarantine before the infection level starts to  
190 decline, it follows from Pontryagin's maximum principle [30, 33] that the optimal strategy of each  
191 government is to choose a time,  $T_i \geq 0$ , at which it switches to a restrictive quarantine and then  
192 to wait until  $I_i = I_{\max}$  before switching to a restrictive quarantine again (Fig. 2).

193 Then,  $T_i^{\text{non}}$ , is the period from  $T_i$  until  $I_i$  approaches  $I_{\max}$ , and the time during which the  
194 quarantine is restrictive,  $T_i^{\text{tot}} - T_i^{\text{non}}$ , is given by the sum of three distinct periods: (i) between  
195  $t = 0$  and  $t = T_i$ , (ii)  $T_{\text{delay}}$  days after  $I_i$  approaches  $I_{\max}$ , and (iii) the time until  $I_i$  declines back  
196 to its initial value,  $I_i(0)$ .

197 To find the optimal solution and the open-loop Nash equilibrium, we first generate a matrix in  
198 which each cell characterizes a set of strategies,  $(T_1, T_2)$ , and we simulate dynamics to calculate  
199 the utility for each country in every cell. Then, the optimal solution is given by  $T_1$  and  $T_2$  that  
200 correspond to the cell in which  $N_1 u_1 + N_2 u_2$  is maximized. In turn, the open-loop Nash  
201 equilibrium is found by calculating the best response of each country to every strategy of the  
202 other country, where the intersection of the curves characterizes the Nash equilibrium (Fig. 2  
203 A,C,E). The values of  $T_1$  and  $T_2$  in the matrix vary between 0 and  $T_{\max}$ , where  $T_{\max}$  is the time  
204 when a restrictive quarantine reduces the infection level in both countries to  $I_{\min}$ . (It is never  
205 worthwhile to keep a restrictive quarantine for more than  $T_{\max}$  days.) In turn, the size of the  
206 matrix determines the resolution at which the strategies  $T_1$  and  $T_2$  are examined, and in Fig. 2,  
207 we used a  $200 \times 200$  matrix.

### Parameterization

208 The estimations of the parameter values used for the simulation are taken from datasets and  
209 literature related to outbreaks of COVID-19 during quarantines [4, 14, 16, 24-27]. Notice that  
210 some parameter values vary significantly between countries and states, and therefore, we  
211 performed sensitivity analyses to verify that the main results are general and hold within wider  
212 parameter ranges.

213 Under restrictive quarantine conditions, a daily decline rate of 5% in the infection level after the  
214 first two weeks is a reasonable estimate. For example, in China, the number of infected  
215 individuals declined from  $\sim 86,000$  to  $\sim 3,000$  within 76 days, which implies  $r_0 \approx -5\%$  per day.  
216 In turn, in several countries, it took about 14-21 days before any decline occurred following a  
217 quarantine, which suggests that considering  $T_{\text{delay}} \approx 14$  days is reasonable. Next, note that  $r_i$   
218 depends on the restrictions used in a given non-restrictive quarantine, and it may vary between  
219 states and countries. We used estimates that reflect the weeks before a restrictive quarantine  
220 was administered in countries in Europe, where  $5\% \leq r_i \leq 15\%$  per day is a reasonable  
221 estimate.

222 In turn, we assume that  $I_{\max}$  is given approximately by the infection level that was approached  
223 in countries in Europe before the restrictive quarantine was administered or two weeks after it  
224 was administered, where considering  $I_{\min} \approx 0.01\% - 0.1\%$  of the total population size is a  
225 reasonable estimate. Next, parameters like  $I_{\min}$  and the travel rates  $\mu_{12}$  and  $\mu_{21}$  are harder to  
226 estimate, as they depend on the specific location and scale of the countries and states  
227 considered. Therefore, we performed sensitivity analyses and examined a variety of values (e.g.,  
228 Fig. 3). Finally, the ratio between  $N_1$  and  $N_2$  reflects the relative population sizes of the two  
229 countries:  $N_1 = N_2$  characterizes the cases demonstrated in Fig. 1A,B and 2A-D, while  $N_1 < N_2$   
230 characterizes the case demonstrated in Fig. 1C and 2E-F.

### Parameter values used to generate the figures

231 Fig. 2A,B:  $r_0 = -5\%$  ( $\text{day}^{-1}$ ),  $r_1 = r_2 = 7\%$  ( $\text{day}^{-1}$ ),  $I_{\max} = 0.1\%$ ,  $I_{\min} = 0.005\%$ ,  $T_{\text{delay}} =$   
232  $14$  (days),  $N_1 = N_2 = 1$ ,  $\mu_{12} = \mu_{21} = 0.2\% \times N_1$ .

233 Fig. 2C,D:  $r_0 = -5\%$  ( $\text{day}^{-1}$ ),  $r_1 = 9\%$  ( $\text{day}^{-1}$ ),  $r_2 = 7\%$  ( $\text{day}^{-1}$ ),  $I_{\max} = 0.1\%$ ,  $I_{\min} =$   
234  $0.005\%$ ,  $T_{\text{delay}} = 14$  (days),  $N_1 = N_2 = 1$ ,  $\mu_{12} = \mu_{21} = 0.25\% \times N_1$ .

235 Fig. 2E,F:  $r_0 = -5\%$  ( $\text{day}^{-1}$ ),  $r_1 = 11\%$  ( $\text{day}^{-1}$ ),  $r_2 = 5\%$  ( $\text{day}^{-1}$ ),  $I_{\max} = 0.1\%$ ,  $I_{\min} =$   
236  $0.005\%$ ,  $T_{\text{delay}} = 14$  (days),  $N_1 = 0.3$ ,  $N_2 = 1$ ,  $\mu_{12} = 0.25\% \times N_1$ ,  $\mu_{21} = 0.25\% \times N_2$ .

237 Fig. 3:  $\mu_{12} = \mu_{21}$  varies (x-axis), and the other parameters are the same as those in Fig. 2A,B.
